# Supplementary material
Source: Springer Nature journal article supplement (https://www.springermedizin.de/resource/supplementary/12967_2013_1837_MOESM3_ESM.pdf/9574922)

**DNA**

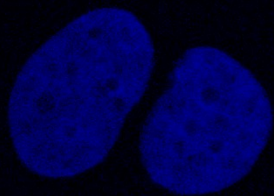

**MCT1**

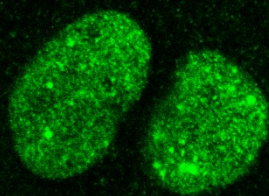

**Merged**

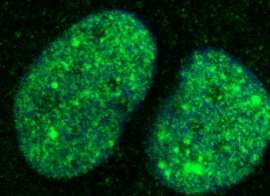

**DNA**

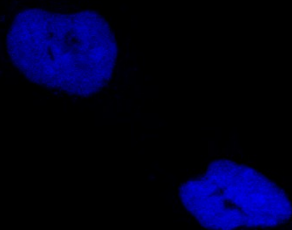

**MCT4**

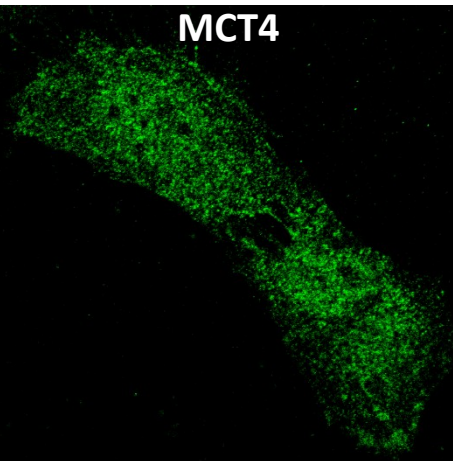

**Merged**

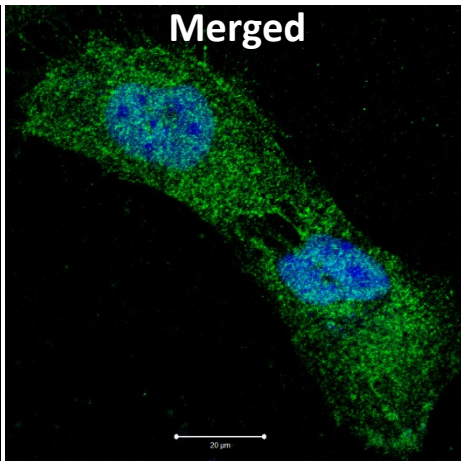

**DNA**

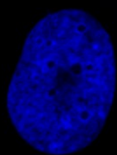

**CD147**

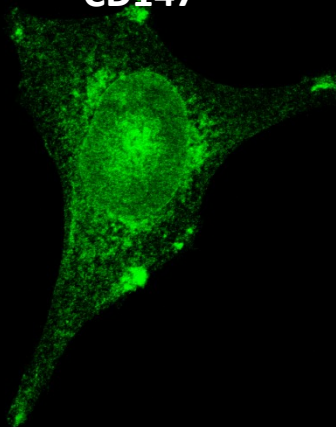

**Merged**

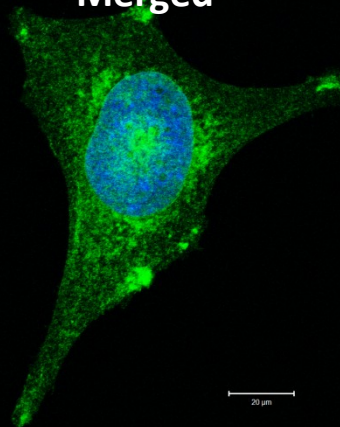

Supplement: MOESM3 [file 9574922]
